# Supplementary material for: Estimates of Exceedances of Critical Loads for Acidifying Deposition in Alberta and Saskatchewan
Source: Copernicus journal article supplement (doi:10.5194/acp-2017-1094), 2018-02-26
Supplement: Supplementary file 1 [file acp-2017-1094-supplement.pdf]

## Supplementary Information for

# “Estimates of Exceedances of Critical Loads for Acidifying Deposition in Alberta and Saskatchewan”

- 5 Paul A. Makar<sup>1</sup>, Ayodeji Akingunola<sup>1</sup>, Julian Aherne<sup>2</sup>, Amanda S. Cole<sup>1</sup>, Yayne-abeba Aklilu<sup>3</sup>, Junhua Zhang<sup>1</sup>, Isaac Wong<sup>4</sup>, Katherine Hayden<sup>1</sup>, Shao-Meng Li<sup>1</sup>, Jane Kirk<sup>5</sup>, Ken Scott<sup>6</sup>, Michael D. Moran<sup>1</sup>, Alain Robichaud<sup>1</sup>, Hazel Cathcart<sup>2</sup>, Pegah Baratzedah<sup>1</sup>, Balbir Pabla<sup>1</sup>, Philip Cheung<sup>1</sup>, Qiong Zheng<sup>1</sup>, Dean S. Jeffries<sup>7</sup>

## Gas-Phase Deposition in GEM-MACH

### 10 *S.1 Deposition Velocity Formula*

The deposition velocity of gases in GEM-MACH is given by the following land-use type and gaseous-species specific equation:

$$V_d = (R_a + R_b + R_c)^{-1} \quad (\text{S.1})$$

where  $R_a$  is the aerodynamic resistance and has the same values for all constituents,  $R_b$  is the quasi-laminar sublayer  
15 resistance which depends on gas diffusivity, and  $R_c$  is the net surface resistance which depends on various environmental factors and land-use. The deposition velocity for each gas for each land-use type in each grid-square is calculated using (A.1), and then net deposition velocity for that grid-square and gas is given by sum of the land-use-fraction-weighted deposition velocities across land-use types within the grid-square.

Ozone deposition velocities calculated via (A.1) are reset to observation-based values. If the land-use is “inland water”, or  
20 “ocean”, Wesely and Hicks (2000) noted that ozone deposition velocities over ocean were found to be in the range 0.01 to 0.05 cm s<sup>-1</sup>, and over freshwater lakes were 0.01 or smaller: a value of 3x10<sup>-4</sup> m s<sup>-1</sup> has been used as a mid-range for these land-use classes. For ozone deposition to tundra, Wesely and Hicks (2000) noted that observational evidence suggested a typical value of 0.15 cm s<sup>-1</sup>, hence 1.5x10<sup>-3</sup> m s<sup>-1</sup> was used here. An overall upper limit of 0.1 m s<sup>-1</sup> was also used on the ozone deposition velocity.

### 25 *S.2 Net Surface Resistance, $R_c$*

The net canopy resistance,  $R_c$ , is given by the following formula (Jacobson (1999), Wesely (1989)):

$$\frac{1}{R_c} = \frac{1-W_{st}}{R_{st}+R_{mx}} + \frac{1}{R_{cut}} + \frac{1}{R_{conv}+R_{exp}} + \frac{1}{R_{can}+R_{soil}} \quad (\text{S.2})$$

Where  $R_{st}$  is the stomatal resistance,  $R_{mx}$  is the mesophyll resistance,  $R_{cut}$  is the cuticle resistance,  $R_{conv}$  is the resistance of gases to buoyant convection,  $R_{exp}$  is the resistance associated with leaves, twigs, bark and other exposed surfaces in the lower canopy,  $R_{can}$  is the resistance associated with the height and density of the vegetated canopy, and  $R_{soil}$  is the resistance associated with the soil, leaf litter, etc., at the surface.  $W_{st}$  is used to account for the impact of precipitation and high humidity on the stomatal and mesophyll resistance, and is set in GEM-MACH to 0.5 if the precipitation rate exceeds  $1 \text{ mm hr}^{-1}$ , or the relative humidity exceeds 95%.

When the surface is snow-covered (the equivalent liquid water depth of snow is greater than 5 mm), the net surface resistance is assumed to follow the observed deposition behavior of  $\text{SO}_2$  (Dasch and Cadle (1986)):

$$\frac{1}{R_c} = \frac{1}{R_{cut+expT_s}} + \frac{1}{R_{conv+R_{exp}+expT_s}} + \frac{1}{R_{can+R_{soil}+expT_s}} \quad (\text{S.3})$$

Where  $exp_{T_s}$  is a temperature dependent function based on fitting to the data presented in Dasch and Cadle (1986):

$$exp_{T_s} = 1000e^{-(T_{surf}+4.0)} \quad (\text{S.4})$$

Where  $T_{surf}$  is the surface temperature in Celcius.

Each of the remaining terms in equations (S.2) and (S.3) are described below.

### S.2.1 $R_{soil}$ : Resistance associated with soil, leaf litter, etc.

Soil resistance for the  $i$ 'th gas and  $j$ 'th land use type and season is also calculated, largely using values from Wesely (1989):

$$R_{soil_{i,j}} = \left( \frac{\alpha_i}{R_{gd,SO_2_j}} + \frac{\beta_i}{R_{gd,O_3_j}} \right)^{-1} \quad (\text{S.5})$$

The values of  $R_{gd,SO_2}$  and  $R_{gd,O_3}$  for the different land use types used in GEM-MACH are given below (Table S1), and are followed by the values of  $\alpha$  and  $\beta$  for each chemical species (Table A2). Values of zero for  $\alpha$  and  $\beta$  indicate that the given term is not used in the creation of  $R_{soil}$ ; if both are zero, no contribution from  $R_{soil}$  used for that species. Note that Wesely (1989) used values of zero for  $R_{gd,SO_2}$  and  $R_{gd,O_3}$  for some terms which are assigned values of 10 in Table S1: the low but non-zero values were used here to avoid division by zero error in the calculation of  $R_{soil}^{ij}$ . Wesely did not include a class for ice caps and glaciers; in Table S1, the values for this land use class for  $R_{gd,O_3}$  were taken from the winter values for inland water, and the most common "Winter; snow and subfreezing value" from the other land use classes,  $100 \text{ sm}^{-1}$ , was used for  $R_{gd,SO_2}$

Table S1.  $R_{gd,SO_2}$  and  $R_{gd,O_3}$  values used in GEM-MACH ( $s\ m^{-1}$ )

| <i>Season</i> →              | Midsummer<br>$R_{gd}$ |                | Autumn,<br>pre-harvest<br>$R_{gd}$ |                | Late<br>Autumn,<br>post-frost,<br>pre-snow<br>$R_{gd}$ |                | Winter; snow<br>and sub-<br>freezing<br>$R_{gd}$ |                | Transitional:<br>spring,<br>partially<br>green, $R_{gd}$ |                |
|------------------------------|-----------------------|----------------|------------------------------------|----------------|--------------------------------------------------------|----------------|--------------------------------------------------|----------------|----------------------------------------------------------|----------------|
| <i>Land Use</i>              | SO <sub>2</sub>       | O <sub>3</sub> | SO <sub>2</sub>                    | O <sub>3</sub> | SO <sub>2</sub>                                        | O <sub>3</sub> | SO <sub>2</sub>                                  | O <sub>3</sub> | SO <sub>2</sub>                                          | O <sub>3</sub> |
| Evergreen needle-leaf forest | 500                   | 200            | 500                                | 200            | 500                                                    | 200            | 100                                              | 3500           | 500                                                      | 200            |
| Evergreen broadleaf forest   | 500                   | 200            | 500                                | 200            | 500                                                    | 200            | 100                                              | 3500           | 500                                                      | 200            |
| Deciduous needle-leaf forest | 500                   | 200            | 500                                | 200            | 500                                                    | 200            | 100                                              | 3500           | 500                                                      | 200            |
| Deciduous broadleaf forest   | 500                   | 200            | 500                                | 200            | 500                                                    | 200            | 100                                              | 3500           | 500                                                      | 200            |
| Mixed Forest                 | 100                   | 300            | 100                                | 300            | 200                                                    | 300            | 100                                              | 3500           | 200                                                      | 300            |
| Grassland                    | 350                   | 200            | 350                                | 200            | 350                                                    | 200            | 100                                              | 3500           | 350                                                      | 200            |
| Crops, mixed farming         | 150                   | 150            | 200                                | 150            | 150                                                    | 150            | 100                                              | 3500           | 150                                                      | 150            |
| Desert                       | 1000                  | 400            | 1000                               | 400            | 1000                                                   | 400            | 1000                                             | 400            | 1000                                                     | 400            |
| Tundra                       | 400                   | 200            | 400                                | 200            | 400                                                    | 200            | 50                                               | 3500           | 400                                                      | 200            |
| Dwarf trees, shrubs          | 400                   | 200            | 400                                | 200            | 10                                                     | 200            | 50                                               | 3500           | 400                                                      | 200            |
| Wetland with plants          | 10                    | 1000           | 10                                 | 800            | 10                                                     | 1000           | 100                                              | 3500           | 10                                                       | 1000           |
| Ice caps and glaciers        | 100                   | 2000           | 100                                | 2000           | 100                                                    | 2000           | 200                                              | 2000           | 100                                                      | 2000           |
| Inland water                 | 10                    | 2000           | 10                                 | 2000           | 10                                                     | 2000           | 10                                               | 2000           | 10                                                       | 2000           |
| Ocean                        | 10                    | 2000           | 10                                 | 2000           | 10                                                     | 2000           | 10                                               | 2000           | 10                                                       | 2000           |
| Urban                        | 400                   | 3000           | 400                                | 3000           | 400                                                    | 3000           | 100                                              | 600            | 500                                                      | 300            |

Table S2: Values of  $\alpha$  and  $\beta$  used in GEM-MACH, by  $S_{\text{dep}}$  and  $N_{\text{dep}}$  gas species:

| Species                        | $\alpha$ | $\beta$ |
|--------------------------------|----------|---------|
| SO <sub>2</sub>                | 1        | 0.0     |
| H <sub>2</sub> SO <sub>4</sub> | 1        | 1.0     |
| NO                             | 0        | 0.01    |
| NO <sub>2</sub>                | 0        | 0.8     |
| HNO <sub>3</sub>               | 10       | 10      |
| PAN                            | 0        | 0.6     |
| HONO                           | 2        | 2.0     |
| Organic Nitrate                | 0        | 0.5     |
| NH <sub>3</sub>                | 1        | 0.0     |

### S.2.2 $R_{\text{can}}$ :

The canopy resistance,  $R_{\text{can}}$  (also called the aerodynamic canopy resistance) is a function of season and land use value, and is based on Zhang *et al.* (2003), given in Table S3.

Table S3.  $R_{can}$  values used in GEM-MACHv2 ( $s\ m^{-1}$ )

| <i>Season</i> →              | Midsummer | Autumn,<br>pre-harvest | Late<br>Autumn,<br>post-frost,<br>pre-snow | Winter;<br>snow and<br>sub-<br>freezing | Transitional:<br>spring,<br>partially<br>green |
|------------------------------|-----------|------------------------|--------------------------------------------|-----------------------------------------|------------------------------------------------|
| Evergreen needle-leaf forest | 100       | 100                    | 100                                        | 100                                     | 100                                            |
| Evergreen broadleaf forest   | 250       | 250                    | 250                                        | 250                                     | 250                                            |
| Deciduous needle-leaf forest | 100       | 85                     | 70                                         | 60                                      | 60                                             |
| Deciduous broadleaf forest   | 250       | 190                    | 115                                        | 100                                     | 100                                            |
| Mixed Forest                 | 190       | 150                    | 110                                        | 100                                     | 100                                            |
| Grassland                    | 40        | 40                     | 40                                         | 10                                      | 30                                             |
| Crops, mixed farming         | 40        | 40                     | 10                                         | 10                                      | 20                                             |
| Desert                       | 0         | 0                      | 0                                          | 0                                       | 0                                              |
| Tundra                       | 0         | 0                      | 0                                          | 0                                       | 0                                              |
| Dwarf trees, shrubs          | 60        | 60                     | 30                                         | 20                                      | 30                                             |
| Wetland with plants          | 20        | 20                     | 20                                         | 20                                      | 20                                             |
| Ice caps and glaciers        | 0         | 0                      | 0                                          | 0                                       | 0                                              |
| Inland water                 | 0         | 0                      | 0                                          | 0                                       | 0                                              |
| Ocean                        | 0         | 0                      | 0                                          | 0                                       | 0                                              |
| Urban                        | 40        | 40                     | 40                                         | 40                                      | 40                                             |

### S.2.3 $R_{exp}$ : Lower Canopy Exposed Surface Resistance

The resistance for the lower canopy follows Wesely (1989), and is given by an equation similar to (S.5):

$$R_{exp} = \left[ 1 \times 10^{-5} \frac{H^*}{R_{exp,SO_2}} + \frac{f_0}{R_{exp,O_3}} \right]^{-1} \quad (S.6)$$

The values of  $R_{exp,SO_2}$  and  $R_{exp,O_3}$  used in GEM-MACHv2 are given in Table A4, and the values of  $H^*$  and  $f_0$  are given in Table S5.

### S.2.4 $R_{mx}$ : Mesophyll Resistance

Mesophyll resistance is usually considered to be of minor importance (Zhang *et al.*, 2002, 2003 use values of 0 to  $100\ s\ m^{-1}$  for  $R_{mx}$ , Baldocchi *et al.* (1987) mention its small impact on a leaf basis, quoting Hosker and Lindberg (1982) values in the range  $10\ to\ 50\ sm^{-1}$ ), and in GEM-MACH follows the formula of Wesely (1989). Table A5 contains the values of  $H^*$  and  $f_0$  used in GEM-MACH for non-zero  $R_{mx}$ , as well as the resulting values of  $R_{mx}$ .

$$R_{mx} = (H^*/3000 + 100f_0)^{-1} \quad (\text{S.7})$$

Table S4.  $R_{\text{exp},\text{SO}_2}$  and  $R_{\text{exp},\text{O}_3}$  values used in GEM-MACH ( $\text{s m}^{-1}$ )

| <i>Season</i> →              | Midsummer<br>Rexp |                | Autumn,<br>pre-harvest<br>Rexp |                | Late<br>Autumn,<br>post-frost,<br>pre-snow<br>Rexp |                | Winter; snow<br>and sub-<br>freezing<br>Rexp |                | Transitional:<br>spring,<br>partially<br>green, Rexp |                |
|------------------------------|-------------------|----------------|--------------------------------|----------------|----------------------------------------------------|----------------|----------------------------------------------|----------------|------------------------------------------------------|----------------|
|                              | SO <sub>2</sub>   | O <sub>3</sub> | SO <sub>2</sub>                | O <sub>3</sub> | SO <sub>2</sub>                                    | O <sub>3</sub> | SO <sub>2</sub>                              | O <sub>3</sub> | SO <sub>2</sub>                                      | O <sub>3</sub> |
| Land Use                     | SO <sub>2</sub>   | O <sub>3</sub> | SO <sub>2</sub>                | O <sub>3</sub> | SO <sub>2</sub>                                    | O <sub>3</sub> | SO <sub>2</sub>                              | O <sub>3</sub> | SO <sub>2</sub>                                      | O <sub>3</sub> |
| Evergreen needle-leaf forest | 2000              | 1000           | 2000                           | 1000           | 3000                                               | 1000           | 200                                          | 1500           | 2000                                                 | 1500           |
| Evergreen broadleaf forest   | 2000              | 1000           | 2000                           | 1000           | 3000                                               | 1000           | 200                                          | 1500           | 2000                                                 | 1500           |
| Deciduous needle-leaf forest | 2000              | 1000           | 9000                           | 400            | 9000                                               | 400            | 9000                                         | 400            | 4000                                                 | 500            |
| Deciduous broadleaf forest   | 2000              | 1000           | 9000                           | 400            | 9000                                               | 400            | 9000                                         | 400            | 4000                                                 | 500            |
| Mixed Forest                 | 2000              | 1000           | 4000                           | 600            | 6000                                               | 1000           | 400                                          | 600            | 3000                                                 | 700            |
| Grassland                    | 2000              | 1000           | 9000                           | 400            | 9000                                               | 400            | 9999                                         | 1000           | 4000                                                 | 500            |
| Crops, mixed farming         | 2000              | 1000           | 9000                           | 400            | 9000                                               | 1000           | 9999                                         | 1000           | 4000                                                 | 1000           |
| Desert                       | 9999              | 9999           | 9999                           | 9999           | 9999                                               | 9999           | 9999                                         | 9999           | 9999                                                 | 9999           |
| Tundra                       | 4000              | 1000           | 9000                           | 400            | 9000                                               | 600            | 9000                                         | 800            | 8000                                                 | 800            |
| Dwarf trees, shrubs          | 2000              | 1000           | 9000                           | 400            | 9000                                               | 400            | 9000                                         | 400            | 4000                                                 | 500            |
| Wetland with plants          | 2500              | 1000           | 9000                           | 600            | 400                                                | 600            | 400                                          | 600            | 3000                                                 | 600            |
| Ice caps and glaciers        | 9999              | 9999           | 9999                           | 9999           | 9999                                               | 9999           | 9999                                         | 9999           | 9999                                                 | 9999           |
| Inland water                 | 9999              | 9999           | 9999                           | 9999           | 9999                                               | 9999           | 9999                                         | 9999           | 9999                                                 | 9999           |
| Ocean                        | 9999              | 9999           | 9999                           | 9999           | 9999                                               | 9999           | 9999                                         | 9999           | 9999                                                 | 9999           |
| Urban                        | 9999              | 9999           | 9999                           | 9999           | 9999                                               | 9999           | 9999                                         | 9999           | 9999                                                 | 9999           |

Table S5.  $H^*$  and  $f_0$  used in GEM-MACH, for  $S_{\text{dep}}$  and  $N_{\text{dep}}$  species.

| Species          | $H^*$              | $f_0$ | $R_{\text{mx}}$       |
|------------------|--------------------|-------|-----------------------|
| SO <sub>2</sub>  | $1 \times 10^5$    | 0.0   | $3.0 \times 10^{-2}$  |
| NO               | $3 \times 10^{-3}$ | 0.0   | $1.0 \times 10^6$     |
| NO <sub>2</sub>  | $1 \times 10^{-2}$ | 0.1   | $1.0 \times 10^{-1}$  |
| HNO <sub>3</sub> | $1 \times 10^{14}$ | 0.0   | $3.0 \times 10^{-11}$ |
| PAN              | $3.6 \times 10^0$  | 0.1   | $1.0 \times 10^{-1}$  |
| HONO             | $1 \times 10^5$    | 0.01  | $2.3 \times 10^{-2}$  |
| NH <sub>3</sub>  | $2.0 \times 10^4$  | 0.0   | $1.5 \times 10^{-1}$  |

### S.2.5 $R_{\text{cut}}$ : Cuticle Resistance

- 5 The dry leaf cuticle resistance is given by the formula of Wesely (1989):

$$R_{\text{cut}} = R_{\text{cuti}} [LAI(10^{-5}H^* + f_0)]^{-1} \quad (\text{S.8})$$

Where LAI is the vertically integrated leaf area index; both LAI and the coefficient  $R_{\text{cuti}}$  are dependent on the land-use type and season, given in Table S6, below.

Table S6. LAI and R<sub>cuti</sub> values used in GEM-MACHv2

|                              | Midsummer |                   | Autumn, pre-harvest |                   | Late Autumn, post-frost, pre-snow |                   | Winter; snow and sub-freezing |                   | Transitional: spring, partially green |                   |
|------------------------------|-----------|-------------------|---------------------|-------------------|-----------------------------------|-------------------|-------------------------------|-------------------|---------------------------------------|-------------------|
|                              | LAI       | R <sub>cuti</sub> | LAI                 | R <sub>cuti</sub> | LAI                               | R <sub>cuti</sub> | LAI                           | R <sub>cuti</sub> | LAI                                   | R <sub>cuti</sub> |
| Evergreen needle-leaf forest | 5.3       | 1000              | 5.3                 | 1500              | 4.7                               | 2000              | 5.5                           | 2000              | 5.5                                   | 1000              |
| Evergreen broadleaf forest   | 4.5       | 1000              | 4.5                 | 1500              | 4.5                               | 2000              | 4.5                           | 2000              | 4.5                                   | 1000              |
| Deciduous needle-leaf forest | 1.1       | 2000              | 0.8                 | 3000              | 0.3                               | 8000              | 0.0                           | 9999              | 0.0                                   | 4000              |
| Deciduous broadleaf forest   | 3.4       | 1200              | 1.9                 | 2000              | 0.1                               | 9000              | 0.0                           | 9999              | 0.0                                   | 2000              |
| Mixed Forest                 | 4.5       | 1000              | 3.5                 | 1500              | 2.3                               | 2000              | 2.3                           | 2000              | 2.3                                   | 1000              |
| Grassland                    | 2.0       | 1500              | 1.5                 | 2000              | 1.0                               | 3000              | 0.5                           | 6000              | 0.5                                   | 1500              |
| Crops, mixed farming         | 2.0       | 1500              | 1.5                 | 2000              | 1.0                               | 3000              | 0.0                           | 9999              | 0.0                                   | 1500              |
| Desert                       | 0.0       | 9999              | 0.0                 | 9999              | 0.0                               | 9999              | 0.0                           | 9999              | 0.0                                   | 9999              |
| Tundra                       | 0.0       | 9999              | 0.0                 | 9999              | 0.0                               | 9999              | 0.0                           | 9999              | 0.0                                   | 9999              |
| Dwarf trees, shrubs          | 2.5       | 4000              | 2.5                 | 1500              | 1.5                               | 2000              | 1.2                           | 3000              | 0.5                                   | 4000              |
| Wetland with plants          | 0.2       | 6000              | 0.2                 | 6000              | 0.1                               | 9000              | 0.0                           | 9999              | 0.1                                   | 6000              |
| Ice caps and glaciers        | 0.0       | 9999              | 0.0                 | 9999              | 0.0                               | 9999              | 0.0                           | 9999              | 0.0                                   | 9999              |
| Inland water                 | 0.0       | 9999              | 0.0                 | 9999              | 0.0                               | 9999              | 0.0                           | 9999              | 0.0                                   | 9999              |
| Ocean                        | 0.0       | 9999              | 0.0                 | 9999              | 0.0                               | 9999              | 0.0                           | 9999              | 0.0                                   | 9999              |
| Urban                        | 0.3       | 6000              | 0.2                 | 6000              | 0.1                               | 9000              | 0.0                           | 9999              | 0.2                                   | 6000              |

### S.2.6 R<sub>conv</sub>: Resistance of gases to buoyant convection

5 The resistance of gases to buoyant convection, and is given by (Wesely, 1989, and assuming a slope of zero on the terrain):

$$R_{conv} = 100 + \left[ 1.0 + \frac{1000}{SRAD+10} \right] \quad (S.9)$$

Where SRAD is the visible solar radiation (Wm<sup>-2</sup>).



### S.2.7 $R_{st}$ : Stomatal Resistance

The stomatal resistance is generated following a similar approach to Jarvis (1976), Zhang *et al.* (2002, 2003), Baldocchi *et al.* (1987), and ValMartin *et al.* (2014), and results from several terms describing its dependence on light ( $k_s(Q_p)$ ), water vapour pressure deficit ( $k_s(\delta e)$ ), temperature ( $k_{st}$ ), CO<sub>2</sub> concentration ( $k_{sca}$ ), the leaf area index ( $LAI$ ), and the ratio of the molecular diffusivities of water to the gas being deposited ( $\frac{D_{H_2O}}{D_{gas}}$ ),

$$R_{st} = \frac{R_{s,min}}{k_s(Q_p)k_s(\delta e)k_{st}k_{sca}LAI} \frac{D_{H_2O}}{D_{gas}} \quad (S.10)$$

The leaf area index depends on the type of vegetation, and is given in Table A6. The minimum stomatal resistance varies with vegetation type; the values used in GEM-MACHv2 are given in Table A7.

The ratio of the molecular diffusivity of water with respect to that of the gas is given by:

$$\frac{D_{H_2O}}{D_{gas}} = \sqrt{\frac{2.608}{\left(1 + \frac{28.9644}{M_{gas}}\right)}} \quad (S.11)$$

Where  $M_{gas}$  is the molecular mass of the depositing gas.

Table S7. Values of minimum stomatal resistance ( $sm^{-1}$ ). Values of 9999 indicate no contribution of stomatal resistance due to the given land-use type at the given season.

|                              | Midsummer | Autumn, pre-harvest | Late Autumn, post-frost, pre-snow | Winter; snow and sub-freezing | Transitional: spring, partially green |
|------------------------------|-----------|---------------------|-----------------------------------|-------------------------------|---------------------------------------|
| Evergreen needle-leaf forest | 130       | 250                 | 250                               | 400                           | 250                                   |
| Evergreen broadleaf forest   | 130       | 250                 | 250                               | 400                           | 250                                   |
| Deciduous needle-leaf forest | 70        | 9999                | 9999                              | 9999                          | 140                                   |
| Deciduous broadleaf forest   | 70        | 9999                | 9999                              | 9999                          | 140                                   |
| Mixed Forest                 | 100       | 800                 | 800                               | 800                           | 190                                   |
| Grassland                    | 120       | 9999                | 9999                              | 9999                          | 240                                   |
| Crops, mixed farming         | 60        | 9999                | 9999                              | 9999                          | 120                                   |
| Desert                       | 9999      | 9999                | 9999                              | 9999                          | 9999                                  |
| Tundra                       | 150       | 9999                | 9999                              | 9999                          | 300                                   |
| Dwarf trees, shrubs          | 70        | 9999                | 9999                              | 9999                          | 140                                   |
| Wetland with plants          | 80        | 9999                | 9999                              | 9999                          | 160                                   |
| Ice caps and glaciers        | 9999      | 9999                | 9999                              | 9999                          | 9999                                  |
| Inland water                 | 9999      | 9999                | 9999                              | 9999                          | 9999                                  |
| Ocean                        | 9999      | 9999                | 9999                              | 9999                          | 9999                                  |
| Urban                        | 9999      | 9999                | 9999                              | 9999                          | 9999                                  |

The formulae for each of the terms in the denominator of equation (S.10) follow.

#### S.2.7.1 $k_s(Q_p)$ , Stomatal conductance correction for photon flux density ( $Q_p$ )

The light dependence of stomatal resistance was provided by curve-fitting to the data of Jarvis (1976), and Ellsworth and Reich, 1993), and included a conversion the input to the formula to be the solar radiation in  $W\ m^{-2}$  (SRAD), resulting in the following formula:

$$k_s(SRAD) = 0.205935 \ln(SRAD) - 0.6052 \quad (\text{S.12})$$

We note here that the light dependence of stomatal resistance is also described in some references by  $G_{st}(SRAD)$ , the response of the stomatal resistance to visible radiation, which may be related to (S.12) via equation (S.13):

$$G_{st}(SRAD) = \frac{k_s(SRAD)R_{s,min}}{LAI} \quad (\text{S.13})$$

5 Using (S.13), the values of the effect of light on stomatal conductance was cross-compared for different references. The values derived using (S.12) for given vegetation types are similar to those derived using the formulae of Baldocchi *et al.* (1987), but are lower than those of the formulae of Zhang *et al.* (2002), for the same land use types. For some vegetation types, the variation in the values of  $k_s(SRAD)$  between Baldocchi *et al.* (1987) and Zhang *et al.* (2002) may be as high as a factor of 1.66 (e.g. for Evergreen coniferous forests, with Baldocchi *et al.* (1987) being the higher values). These differences stem from different assumptions and lighting models being used between these and other references, and probably account for much of the factor of two differences between estimates of gas-phase deposition between these references.

### S.2.7.2 $k_s(\delta e)$ , Stomatal conductance correction for vapour pressure deficit ( $\delta e$ )

15 In GEM-MACHv2, this term is given by:

$$k_s(\delta e) = 1.0 - 0.03(1 - HU_r) 10^{\left[ \frac{0.7859 + 0.03477 T_{surf}}{1 + 0.00412 T_{surf}} \right]} \quad (\text{S.14})$$

Where  $T_{surf}$  is the surface temperature (the term in which  $T_{surf}$  appears gives the saturation vapour pressure of water in mb – a minimum value of 1mb is used here), and  $HU_r$  is the relative humidity on a 0 to 1 scale. We note that this term is also referenced as  $f_{vpd}$  in Meyers *et al.* (1988), and  $f(D)$  in Brook *et al.* (1999). Zhang *et al.* (2002) and Zhang *et al.* (2003) use vegetation-dependent values for this correction factor; here it was noted that the range of uncertainty across different references for the same vegetation types was high, so a single value was derived based on fitting to the available data.

### S.2.7.3 $k_{st}$ , Stomatal conductance correction for the temperature

25 The temperature dependence of the stomatal resistance in GEM-MACHv2 is given by equation (S.15):

$$k_{st} = \left[ \frac{(T_a(z) - T_{min})(T_{max} - T_a(z))}{(T_{opt} - T_{min})(T_{max} - T_{opt})} \right]^{0.614} \quad (\text{S.15})$$

Where  $T_a(z)$  is the ambient air temperature at height ( $z$ ), and  $T_{max}$ ,  $T_{min}$ , and  $T_{opt}$  are vegetation dependent parameters; the GEM-MACHv2 values are given in Table A8 (based on Wesel (1989)). Meyers *et al.* (1998) and Zhang *et al.* (2002) use a value of  $\left( \frac{T_{max} - T_{opt}}{T_{opt} - T_{min}} \right)$  for the exponential in the formula, while Jarvis (1976) used  $\left( \frac{T_{max} - T_{opt}}{T_{max} - T_{min}} \right)$ . However, the Jarvis' exponential term use of  $T_{max}$  in the denominator is almost certainly a typo, since its use would result in values of  $k_{st}$  greater than unity. Here, the value of 0.614 (based on fitting of the available data, which again had a large variation between different references) was used.

Table S8. Temperature-dependent Stomatal Conductance parameters used in GEM-MACHv2. Values of 9999.0 indicate no air-surface exchange via this resistance pathway.

| Land use category            | $T_{\max}$ | $T_{\min}$ | $T_{\text{opt}}$ |
|------------------------------|------------|------------|------------------|
| Evergreen needle-leaf forest | 40.0       | -5.0       | 15.0             |
| Evergreen broadleaf forest   | 45.0       | 0.0        | 30.0             |
| Deciduous needle-leaf forest | 40.0       | -5.0       | 15.0             |
| Deciduous broadleaf forest   | 45.0       | 0.0        | 27.0             |
| Mixed forest                 | 42.0       | -3.0       | 21.0             |
| Grassland                    | 45.0       | 5.0        | 27.0             |
| Crops, mixed farming         | 45.0       | 5.0        | 25.0             |
| Desert                       | 9999.0     | 9999.0     | 9999.0           |
| Tundra                       | 9999.0     | 9999.0     | 9999.0           |
| Dwarf trees, shrubs          | 43.0       | 0.0        | 21.5             |
| Wet land with plants         | 45.0       | 5.0        | 25.0             |
| Ice caps and glaciers        | 9999.0     | 9999.0     | 9999.0           |
| Inland water                 | 9999.0     | 9999.0     | 9999.0           |
| Ocean                        | 9999.0     | 9999.0     | 9999.0           |
| Urban                        | 45.0       | 0.0        | 22.0             |

#### S.2.7.4 $k_{sca}$ , Stomatal conductance correction for the concentration of $CO_2$

- 5 The stomatal resistance correction for the presence of  $CO_2$  in GEM-MACHv2 was based on curve-fitting and conversion of units to solar radiation (SRAD) to data presented in Jarvis (1976), to derive a continuous function of the radiation and  $CO_2$  concentration data presented there:

$$k_{sca} = \begin{cases} 1.0, [CO_2] \leq 100 \\ 1 - \{7.352 \times 10^{-4} \ln[\ln(S_{rad})] - 8.748 \times 10^{-4}\} [CO_2], 100 < [CO_2] < 1000 \\ 0.0, [CO_2] \geq 1000 \end{cases} \quad (S.16)$$

Where  $S_{rad}$  is the incoming solar radiation in  $Wm^{-2}$ . Jarvis original experiments with Sitka spruce and Douglas fir, suffered from an insufficient range of variation in the ambient  $CO_2$  concentration to be able to determine the values of the numerical constants for the coefficients for the  $CO_2$  concentration; consequently they were set to zero and the  $CO_2$  effect was thereafter neglected in that reference. However, Jarvis also presented laboratory results with varying  $CO_2$  concentrations, which suggested the impact of changes in  $CO_2$  could be large (Jarvis 1976, Figure 15). We note however, that the solar radiation dependence in (A.16), resulting from curve-fitting to Jarvis (1976), may result in some inconsistencies in the accounting for the impact of solar radiation, which also appears in (S.12).

### S.3 Aerodynamic Resistance, $R_a$

The aerodynamic and quasi-laminar sublayer resistances are relatively minor contributions to the overall deposition velocity compared to the surface resistance. The aerodynamic resistance is calculated using a variation on the approach of Voldner *et al.* (1986):

$$R_a = \frac{\ln\left(\frac{Z_H+z_0}{z_0}\right) - \psi_c}{ku^*} \quad (\text{S.17})$$

The values of the parameter  $\psi_c$  is given by the following formulae, where L is the Monin-Obukhov length,  $u^*$  is the friction velocity,  $z_0$  is the local (land-use dependent) roughness length, and  $Z_H$  is a reference height (10m):

$$\psi_c = \begin{cases} -5 \left( \frac{Z_H - z_0}{L} \right), & \frac{Z_H}{L} > 0.01 \\ e \left[ 0.598 + 0.39 \ln\left(\frac{-Z_H}{L}\right) - 0.18 \ln\left(\frac{-Z_H}{L}\right) \right] & \frac{Z_H}{L} < -0.01 \\ -e \left[ 0.598 + 0.39 \ln\left(\frac{-z_0}{L}\right) - 0.18 \ln\left(\frac{-z_0}{L}\right) \right] & \\ 0, & -0.01 \leq \frac{Z_H}{L} \leq 0.01 \end{cases} \quad (\text{S.18})$$

#### 5 S.4 Quasi-laminar sublayer resistance, $R_b$

The quasi-laminar sublayer resistance is given by (Hicks *et al.*, 1987):

$$R_b = \frac{2 \left( \frac{Sc_{gas}}{Pr} \right)^{2/3}}{ku^*} \quad (\text{S.19})$$

Where the  $P_r$  is the Prandtl number for air (0.72),  $k$  is the von Karman constant (0.4), and  $u^*$  is the friction velocity.  $Sc_{gas}$  is the Schmidt number for the gas, and is given by:

$$10 \quad Sc_{gas} = 0.84 \frac{D_{H_2O}}{D_{gas}} \quad (\text{S.20})$$

The ratio of the molecular diffusivity of water to the gas is given in equation (S.11).
